# Supplementary material
Source: PubMed Central journal article supplement (PMC5622875)

**Red blood cell Gardos channel (KCNN4): the essential determinant of erythrocyte dehydration in hereditary xerocytosis**

Raphaël Rapetti-Mauss,<sup>1</sup> Véronique Picard,<sup>2</sup> Corinne Guitton,<sup>3</sup> Khaldoun Ghazal,<sup>4</sup> Valérie Proulle,<sup>5</sup> Catherine Badens,<sup>6,7</sup> Olivier Soriani,<sup>1</sup> Loïc Garçon<sup>8</sup> and Hélène Guizouarn<sup>1</sup>

<sup>1</sup>Université Côte d'Azur, CNRS, Inserm, iBV; <sup>2</sup>Univ Paris Sud-Paris Saclay, Faculté de pharmacie, Service d'Hématologie biologique, Hôpital Bicêtre, APHP, Le Kremlin-Bicêtre; <sup>3</sup>Service d'Hématologie et Rhumatologie Pédiatrique, Centre de Référence 'Maladies constitutionnelles du Globule rouge', Hôpital Bicêtre, APHP, Le Kremlin-Bicêtre; <sup>4</sup>Service de biochimie, Hôpital Bicêtre, APHP, Le Kremlin-Bicêtre; <sup>5</sup>Service d'Hématologie biologique, Hôpital Bicêtre, APHP, Le Kremlin-Bicêtre; <sup>6</sup>Aix Marseille Univ, INSERM, GMGF, Marseille; <sup>7</sup>APHM Département de Génétique Médicale, Hôpital de la Timone, Centre de Référence Thalasémie, Marseille and <sup>8</sup>EA4666, UPJV et Service d'Hématologie Biologique, CHU Amiens, France

Correspondence: guizouar@unice.fr  
doi:10.3324/haematol.2017.171389

Supplemental Table 1: Molecular, clinical and hematological characteristics of the 3 HX subjects .

Patients were diagnosed through specialized consultation by a hematologist or a clinical geneticist in CHU Amiens and CHU Bicêtre. These subjects were initially diagnosed using osmolar gradient ektacytometry. Informed consents for genetic analysis were obtained for all patients, according to local institutional ethical boards. Analyses were done on fresh cells at room temperature.

RBC: Red blood cell count, Hb: Hemoglobin, Ht: Hematocrit, MCV: Mean Corpuscular Volume, MCH: mean corpuscular hemoglobin, MCCH: Mean corpuscular concentration of hemoglobin, Retic: reticulocytes count, PHK: Pseudohyperkalemia, PNE: Perinatal Edema, Y=yes, N=no.

Values outside normal range are highlighted with a blue star.

| Id | Piezo1 substitution | age | Family History | RBC (10 <sup>12</sup> /L) | Hb (g/dL) | Ht (%) | MCV (fL) | MCH (pg/cell) | MCCH (%) | Retic. (10 <sup>9</sup> /L) | PHK | PNE | Ektacytometry at diagnosis (IDmax, Omin and O'mOsm/kg) |
|----|---------------------|-----|----------------|---------------------------|-----------|--------|----------|---------------|----------|-----------------------------|-----|-----|--------------------------------------------------------|
| 1  | p.V598M             | 40  | Y              | 3.60                      | 13.9      | 0.41   | 115.0*   | 38.7*         | 33.6     | 346*                        | Y   | Y   | Y (0,41,130*, 289                                      |
| 2  | p.F681S             | 42  | ND             | 3.66                      | 13.6      | 0.37   | 101.1*   | 37.2*         | 36.8*    | 220*                        | Y   | N   | Y (0,53, 123*, 316                                     |
| 3  | p.G782S/R808Q       | 33  | Y              | 5.19                      | 17.1      | 0.48   | 92.7     | 32.9          | 35.5     | 261*                        | Y   | Y   | Ref <sup>9</sup>                                       |

MCV normal range : 80 -100 fL  
MCH normal range : 27 - 32 pg/cell  
MCCH normal range : 32 -36 %  
reticulocytes normal range : 20 - 80 10<sup>9</sup> /L

Ektacytometry normal range

ID max > 0, 4  
O min 135 -145 mosmol/kg  
O' > 320 mOsm/kg

Supplemental table 2: Na<sup>+</sup> and K<sup>+</sup> contents in RBCs from patients and corresponding control at blood reception (t=0).

Data are expressed in  $\mu\text{mol}$  per gram of dry cell weight. Data are means $\pm$ sem, n=6 for V598M and G782S/R808Q and n=3 for F681S Piezo1 mutations. \* p<0.05, Mann and Whitney test, comparison of mutant versus control, corresponding to normal volunteers.

| $\mu\text{mol/g d.w.}$ | Na <sup>+</sup> |                |                | K <sup>+</sup>   |                  |                  |
|------------------------|-----------------|----------------|----------------|------------------|------------------|------------------|
| Control                | 48.1 $\pm$ 4.2  | 52.4 $\pm$ 5.6 | 55.7 $\pm$ 1.3 | 216.3 $\pm$ 9.4  | 237.3 $\pm$ 5.1  | 231.2 $\pm$ 2.1  |
| V598M                  | 55.3 $\pm$ 0.9  |                |                | 180.5 $\pm$ 4.8* |                  |                  |
| F681S                  |                 | 64.4 $\pm$ 0.8 |                |                  | 185.9 $\pm$ 1.6* |                  |
| G782S/R808Q            |                 |                | 57.1 $\pm$ 1.6 |                  |                  | 203.4 $\pm$ 9.4* |

### Supplemental Figure 1

Ektacytometric profile of patients 1 (top) and patient 2 (bottom), in red, compared with control, in blue, showing an overall switch of the curve to the left, in agreement with RBC dehydration.

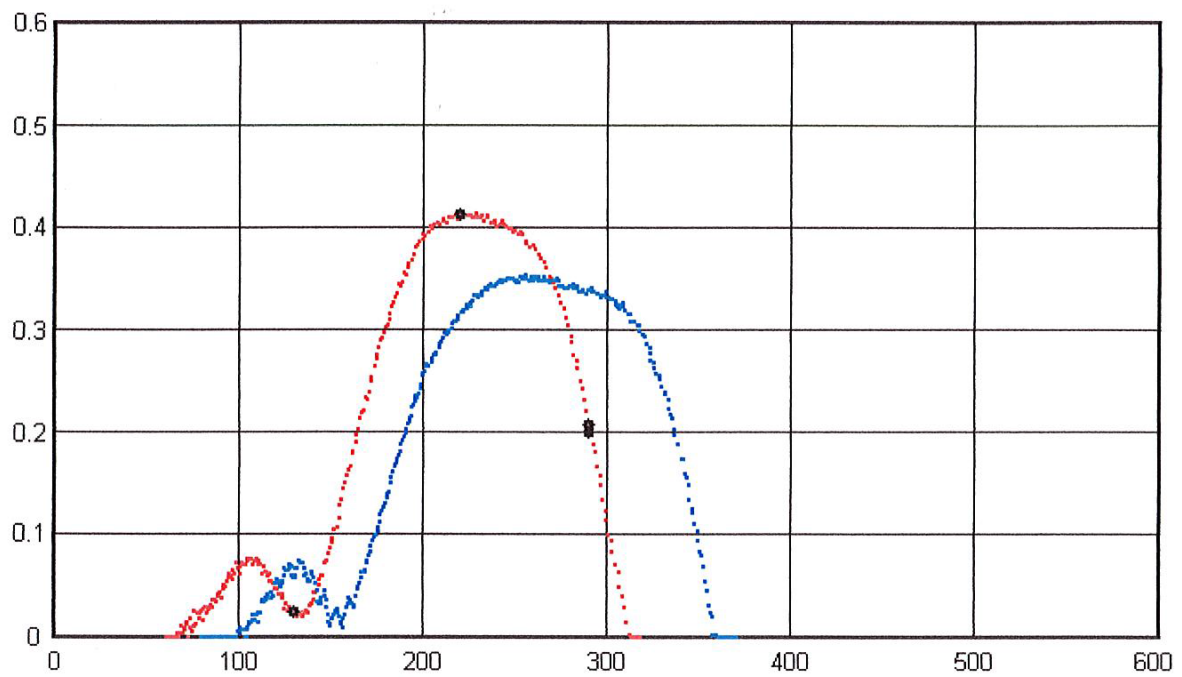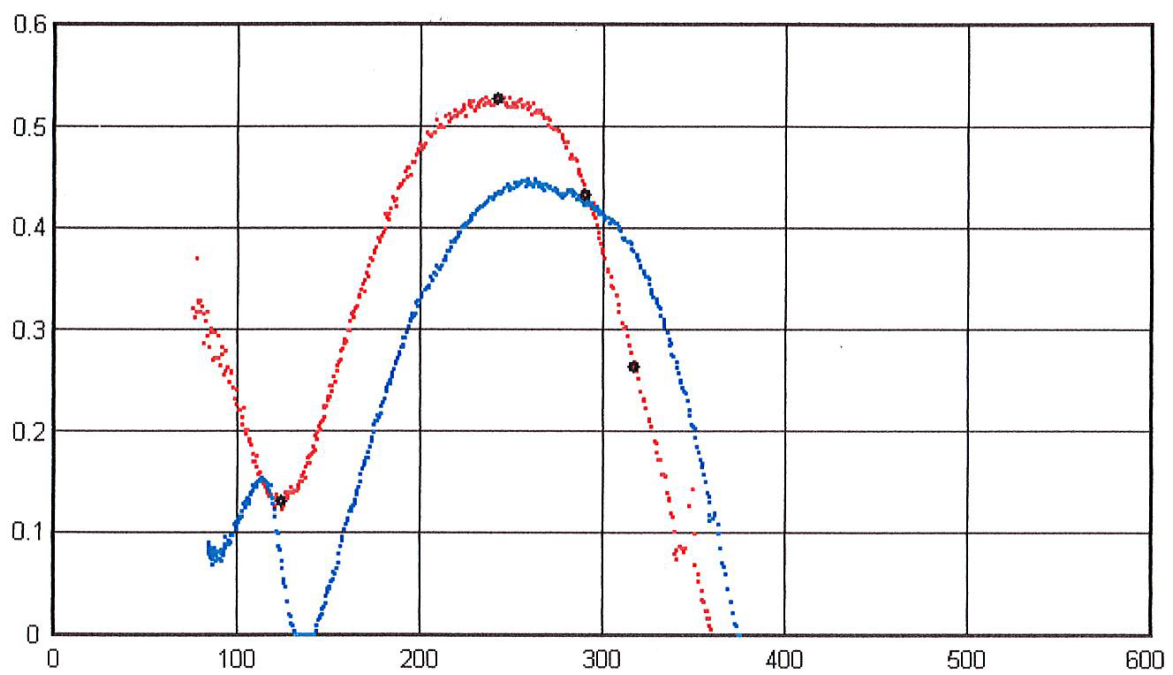

## Supplemental Figure 2

*PIEZO1* and *KCNN4* coding sequences and intron-exons junctions were analyzed by Sanger sequencing (AbiPrism DNA Analyser 3130 or 3730 and Big Dye Terminator cycle sequencing kit, Applied Biosystems).

A) Identification of two unreported heterozygous mutations in *PIEZO1*, a c1792G>A mutation in exon 14, leading to pVal598Met substitution (patient 1) and a c2042T>C mutation in exon 16 leading to Phe681Ser substitution (patient 2)

B) Val 598 and Phe681 are highly conserved amino acid residues in Piezo1.

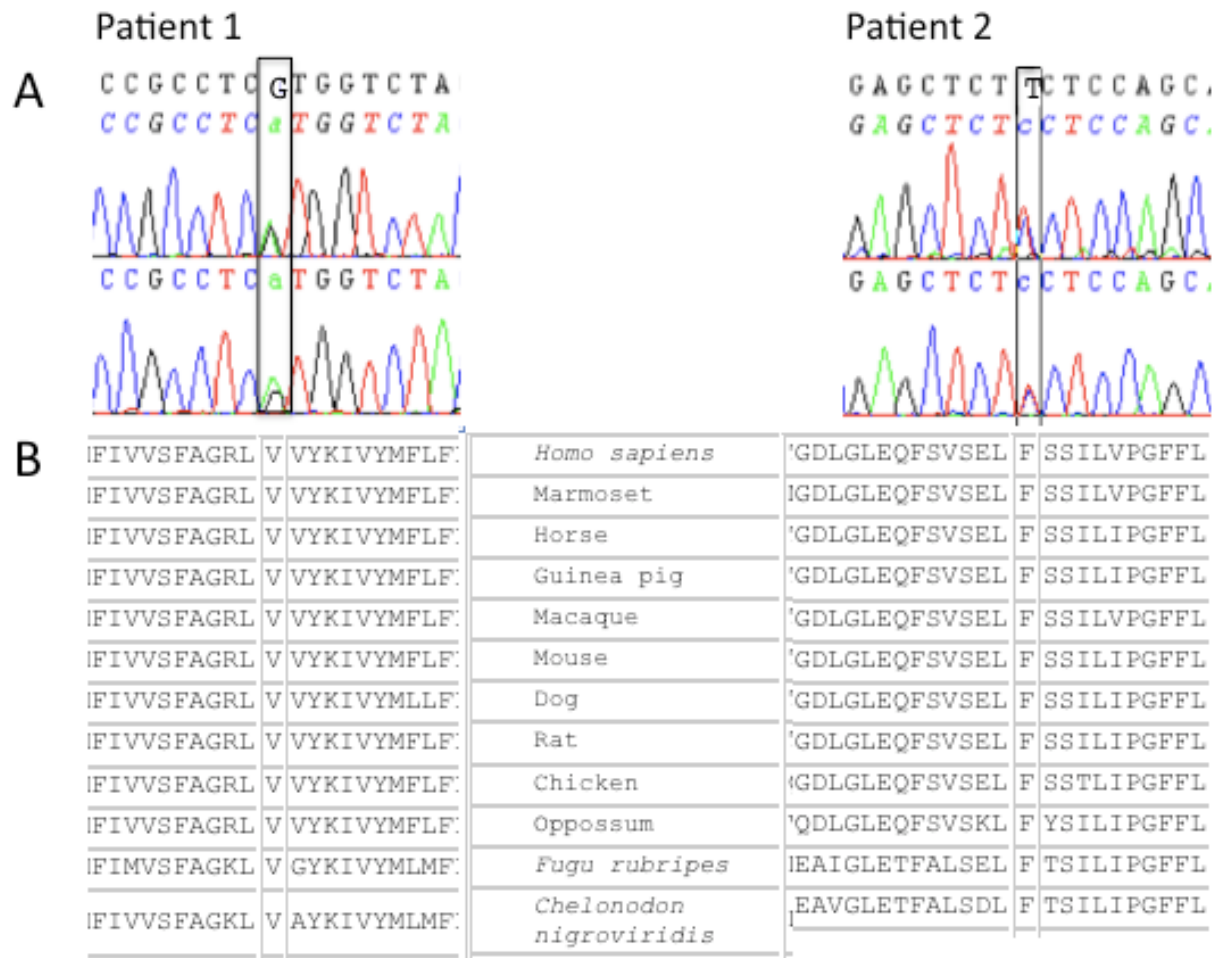

Supplemental figure 3:

A) I/V curves of RBCs with WT Piezo1 (ctl) or V598M mutation just after whole cell configuration is reached. B) Time course of current registered at -80 mV in RBCs with V598M mutation. Representative traces.

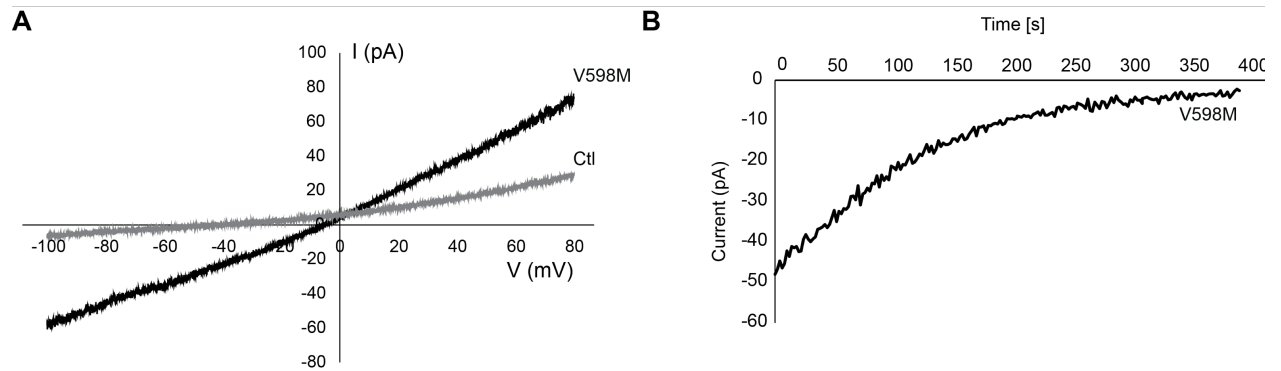

Supplemental figure 4: Kinetic of Na<sup>+</sup> and K<sup>+</sup> movements induced by Yoda1 in control red blood cells.

In order to assess the involvement of Piezo1 channel in RBC cation permeability, Yoda1, a Piezo1 activator was used. Control RBCs were treated by 15  $\mu$ M Yoda1 in presence of ouabain to prevent cation recirculation through the Na<sup>+</sup>/K<sup>+</sup> ATPase pump. K<sup>+</sup> (A) and Na<sup>+</sup> (B) contents were measured with or without TRAM-34 as a function of time. Black squares: 15  $\mu$ M Yoda1; red squares: 15  $\mu$ M Yoda1 + 10  $\mu$ M TRAM-34. Data are means $\pm$ sem, n=3.

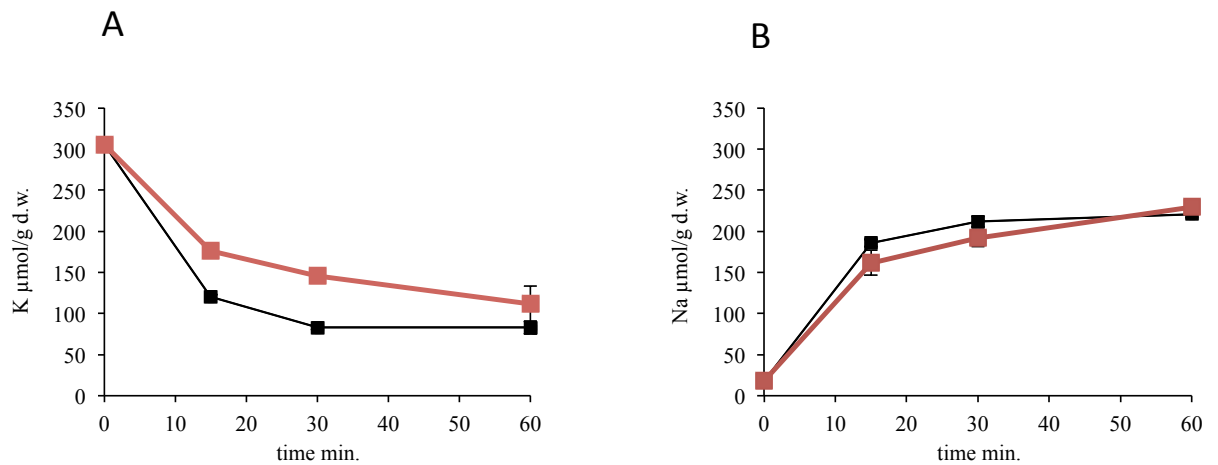

Supplement: 2017.171389.RAPETTI-MAUSS_SUPPL.pdf [file 2017.171389.RAPETTI-MAUSS_SUPPL.pdf]
