# Supplementary material
Source: PubMed Central journal article supplement (PMC5622875)
Supplement: 2017_171389-Disclosures_and_Contributions.pdf [file 2017_171389-Disclosures_and_Contributions.pdf]

Haematologica  
HAEMATOL/2017/171389  
Version 4

Red blood cell Gardos channel (KCNN4):the essential determinant of erythrocyte dehydration in Hereditary Xerocytosis

Raphaël Rapetti-Mauss, Véronique Picard, Corinne Guitton, Khaldoun Ghazal, Valérie Proulle, Catherine Badens, Olivier Soriani, Loïc Garçon, and Hélène Guizouarn

Disclosures: none

Contributions: RRM did the patch clamp experiments, prepared and corrected the manuscript, VePi, VaPr and KG performed biochemical, hematological and genetic diagnostic tests, VePi and LG participated in writing the manuscript, CG and LG were in charge of the patients, CB: designed the study and edited the manuscript, OS: did and supervised the patch clamp study, prepared and corrected the manuscript, HG designed and supervised the study, did the experiments, wrote the manuscript.
